# Supplementary material
Source: publisher figshare collection journal article supplement (https://aacr.figshare.com/articles/dataset/_/22674276)
Supplement: Supplementary file 1 [file 40243602]

Comparison of gene expression by RNA sequencing

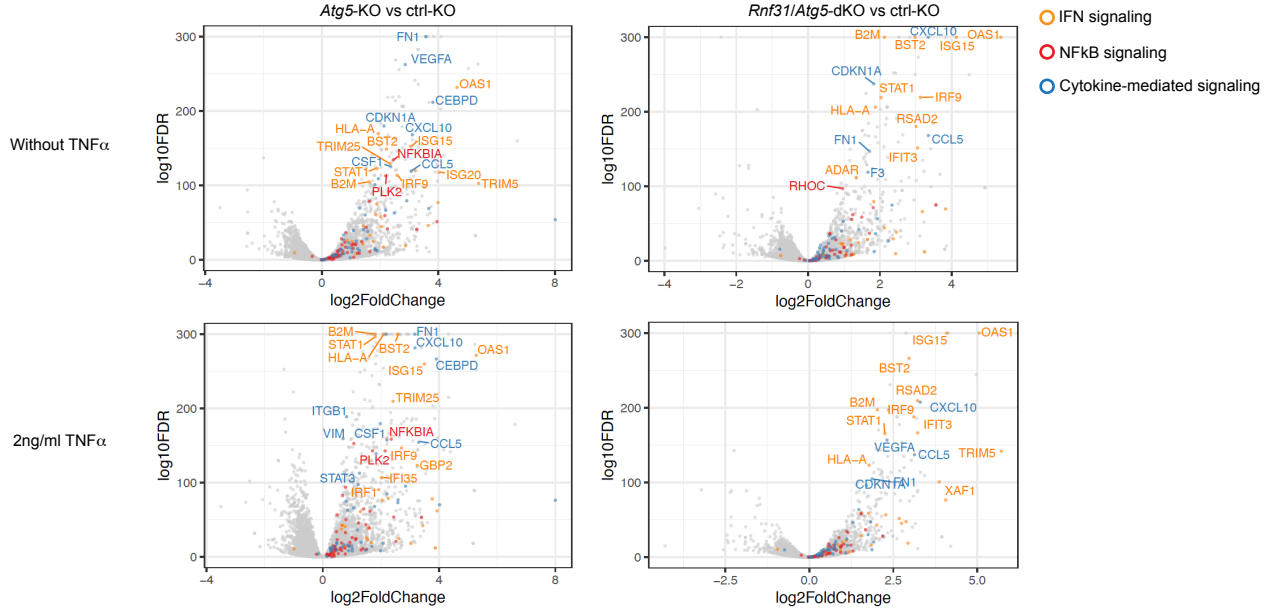

**Supplementary Fig. S4. Differentially expressed genes revealed by RNA-seq analysis.**

Volcano plots of differentially expressed genes by RNA-seq analysis. B16 *B2m*<sup>-/-</sup> ctrl-KO cells, B16 *B2m*<sup>-/-</sup> *Atg5*-KO cells, and B16 *B2m*<sup>-/-</sup> *Rnf31/Atg5*-dKO cells were cultured for 24h with or without 2ng/ml TNF $\alpha$ . False discovery rate (FDR) ( $\log_{10}$  adjusted FDR) was plotted against  $\log_2$  fold change of gene expression levels (B16 *B2m*<sup>-/-</sup> exp-KO cells / B16 *B2m*<sup>-/-</sup> ctrl-KO cells).
